# Supplementary material for: Coding and noncoding variants in HFM1, MLH3, MSH4, MSH5, RNF212, and RNF212B affect recombination rate in cattle
Source: PubMed Central journal article supplement — Genome Res. 2016 Oct;26(10):1323–32. doi: 10.1101/gr.204214.116 (PMC5052053; doi:10.1101/gr.204214.116), 2016-10
Supplement: supp_gr.204214.116_Supplemental_File_S1.pdf [file supp_gr.204214.116_Supplemental_File_S1.pdf]

**Credible set of variants ( $r^2 > 0.90$  with the lead variant) associated with BTA3 QTL in males**

| Position<br>(Bos Tau6) | Reference<br>allele | Alternative<br>allele | Imputation<br>Accuracy | Frequency | Effect     | P-value    | Annotation with snpEFF        |
|------------------------|---------------------|-----------------------|------------------------|-----------|------------|------------|-------------------------------|
| 53642047               | T                   | C                     | 0,872                  | 0,14111   | -0,7880366 | 7,9465E-12 | EFF=INTERGENIC(MODIFIER     ) |
| 53642233               | A                   | G                     | 0,874                  | 0,140913  | -0,7890053 | 8,1742E-12 | EFF=INTERGENIC(MODIFIER     ) |
| 53644767               | G                   | A                     | 0,904                  | 0,137347  | -0,7785415 | 2,9081E-11 | EFF=INTERGENIC(MODIFIER     ) |
| 53643984               | T                   | C                     | 0,905                  | 0,137255  | -0,7777605 | 3,0784E-11 | EFF=INTERGENIC(MODIFIER     ) |
| 53641388               | C                   | T                     | 0,913                  | 0,137459  | -0,7740791 | 3,378E-11  | EFF=INTERGENIC(MODIFIER     ) |
| 53642816               | A                   | C                     | 0,909                  | 0,13736   | -0,775255  | 3,42E-11   | EFF=INTERGENIC(MODIFIER     ) |
| 53642173               | G                   | T                     | 0,917                  | 0,137687  | -0,7751592 | 3,433E-11  | EFF=INTERGENIC(MODIFIER     ) |
| 53639333               | T                   | C                     | 0,94                   | 0,1364    | -0,7641587 | 6,5587E-11 | EFF=INTERGENIC(MODIFIER     ) |
| 53639087               | C                   | T                     | 0,921                  | 0,138535  | -0,7483931 | 1,0565E-10 | EFF=INTERGENIC(MODIFIER     ) |
| 53631012               | G                   | A                     | 0,986                  | 0,134583  | -0,7381945 | 2,3741E-10 | EFF=INTERGENIC(MODIFIER     ) |
| 53638851               | C                   | T                     | 0,951                  | 0,134431  | -0,7462741 | 2,8782E-10 | EFF=INTERGENIC(MODIFIER     ) |
| 53646068               | C                   | T                     | 0,919                  | 0,133313  | -0,7406969 | 4,5111E-10 | EFF=INTERGENIC(MODIFIER     ) |
| 53635665               | T                   | G                     | 0,987                  | 0,134378  | -0,7069511 | 1,189E-09  | EFF=INTERGENIC(MODIFIER     ) |
| 53636311               | A                   | G                     | 0,988                  | 0,134425  | -0,7057608 | 1,2553E-09 | EFF=INTERGENIC(MODIFIER     ) |
| 53637010               | G                   | A                     | 0,977                  | 0,134118  | -0,7068752 | 1,2984E-09 | EFF=INTERGENIC(MODIFIER     ) |
| 53637846               | G                   | A                     | 0,963                  | 0,132825  | -0,7119708 | 1,3056E-09 | EFF=INTERGENIC(MODIFIER     ) |
| 53641464               | A                   | G                     | 0,936                  | 0,127337  | -0,7142502 | 5,4331E-09 | EFF=INTERGENIC(MODIFIER     ) |

**Credible set of variants ( $r^2 > 0.90$  with the lead variant) associated with BTA3 QTL in females**

| Position<br>(Bos Tau6) | Reference<br>allele | Alternative<br>allele | Imputation<br>Accuracy | Frequency | Effect | P-value  | Annotation with snpEFF                                                                                       |
|------------------------|---------------------|-----------------------|------------------------|-----------|--------|----------|--------------------------------------------------------------------------------------------------------------|
| 52179921               | A                   | C                     | 0,88                   | 0,18      | -0,40  | 2,05E-07 | EFF=INTRON(MODIFIER     HFM1 protein_coding CODING ENSBTAT00000027789 18)                                    |
| 52179777               | G                   | A                     | 0,88                   | 0,18      | -0,40  | 2,05E-07 | EFF=INTRON(MODIFIER     HFM1 protein_coding CODING ENSBTAT00000027789 18)                                    |
| 52200042               | A                   | C                     | 0,88                   | 0,18      | -0,40  | 2,06E-07 | EFF=INTRON(MODIFIER     HFM1 protein_coding CODING ENSBTAT00000027789 24)                                    |
| 52214908               | C                   | T                     | 0,88                   | 0,18      | -0,40  | 2,06E-07 | EFF=INTRON(MODIFIER     HFM1 protein_coding CODING ENSBTAT00000027789 29)                                    |
| 52227983               | C                   | T                     | 0,88                   | 0,18      | -0,40  | 2,12E-07 | EFF=NON_SYNONYMOUS_CODING(MODERATE MISSENSE tCa/tTa S1189L HFM1 protein_coding CODING ENSBTAT00000027789 31) |
| 52221343               | G                   | A                     | 0,89                   | 0,18      | -0,40  | 2,12E-07 | EFF=INTRON(MODIFIER     HFM1 protein_coding CODING ENSBTAT00000027789 29)                                    |
| 52222317               | G                   | A                     | 0,89                   | 0,18      | -0,40  | 2,12E-07 | EFF=INTRON(MODIFIER     HFM1 protein_coding CODING ENSBTAT00000027789 29)                                    |
| 52169462               | T                   | A                     | 0,85                   | 0,18      | -0,40  | 2,35E-07 | EFF=INTRON(MODIFIER     HFM1 protein_coding CODING ENSBTAT00000027789 10)                                    |
| 52164943               | C                   | G                     | 0,86                   | 0,18      | -0,40  | 2,72E-07 | EFF=INTRON(MODIFIER     HFM1 protein_coding CODING ENSBTAT00000027789 5)                                     |
| 52129098               | G                   | C                     | 0,84                   | 0,18      | -0,40  | 3,93E-07 | EFF=INTERGENIC(MODIFIER     )                                                                                |

Note: these two signals are linked

The variants capture the same haplotype effect

In males from INRA population,  $r^2 > 0.90$  between the two sets and similar significance is achieved

Using the best imputed genotypes only (doses close to 0, 1 or 2), the  $r^2 > 0.90$  between the two sets

**Credible set of variants ( $r^2 > 0.90$  with the lead variant) associated with second BTA3 QTL in females**

| Position<br>(Bos Tau6) | Reference<br>allele | Alternative<br>allele | Imputation<br>Accuracy | Frequency | Effect | P-value    | Annotation with snpEFF                                                                                     |
|------------------------|---------------------|-----------------------|------------------------|-----------|--------|------------|------------------------------------------------------------------------------------------------------------|
| 69238413               | T                   | A                     | 0,83                   | 0,20      | -0,52  | 2,5386E-10 | EFF=INTRON(MODIFIER)   MSH4 protein_coding CODING ENSBTAT00000024552 16 WARNING_TRANSCRIPT_NO_START_CODON) |
| 69200566               | C                   | T                     | 0,87                   | 0,20      | -0,50  | 4,4661E-10 | EFF=INTRON(MODIFIER)   ASB17 protein_coding CODING ENSBTAT00000007708 1)                                   |
| 69186209               | G                   | A                     | 0,85                   | 0,20      | -0,51  | 4,4674E-10 | EFF=INTERGENIC(MODIFIER     )                                                                              |
| 69179842               | C                   | G                     | 0,86                   | 0,20      | -0,50  | 4,6883E-10 | EFF=UPSTREAM(MODIFIER  401  U6 snRNA NON_CODING ENSBTAT00000060003 )                                       |
| 69165586               | C                   | A                     | 0,87                   | 0,20      | -0,50  | 4,9443E-10 | EFF=INTERGENIC(MODIFIER     )                                                                              |
| 69225396               | C                   | T                     | 0,84                   | 0,20      | -0,51  | 5,2499E-10 | EFF=INTRON(MODIFIER)   MSH4 protein_coding CODING ENSBTAT00000024552 17 WARNING_TRANSCRIPT_NO_START_CODON) |
| 69130931               | G                   | T                     | 0,88                   | 0,20      | -0,50  | 6,267E-10  | EFF=INTERGENIC(MODIFIER     )                                                                              |
| 69136214               | T                   | C                     | 0,87                   | 0,20      | -0,50  | 6,4178E-10 | EFF=INTERGENIC(MODIFIER     )                                                                              |
| 69133518               | C                   | T                     | 0,87                   | 0,20      | -0,50  | 6,4395E-10 | EFF=INTERGENIC(MODIFIER     )                                                                              |
| 69162292               | GAT                 | GATAT,GAT/            | 0,55                   | 0,21      | -0,50  | 1,1621E-09 | EFF=INTERGENIC(MODIFIER     )                                                                              |
| 69262712               | T                   | G                     | 0,83                   | 0,20      | -0,50  | 1,2373E-09 | EFF=INTRON(MODIFIER)   MSH4 protein_coding CODING ENSBTAT00000024552 9 WARNING_TRANSCRIPT_NO_START_CODON)  |
| 69264727               | A                   | G                     | 0,84                   | 0,20      | -0,49  | 1,273E-09  | EFF=INTRON(MODIFIER)   MSH4 protein_coding CODING ENSBTAT00000024552 8 WARNING_TRANSCRIPT_NO_START_CODON)  |
| 69267679               | A                   | T                     | 0,84                   | 0,20      | -0,49  | 1,6241E-09 | EFF=INTRON(MODIFIER)   MSH4 protein_coding CODING ENSBTAT00000024552 8 WARNING_TRANSCRIPT_NO_START_CODON)  |

**Information on the *MSH4* NS variant presenting high association with female GRR but outside the credible set of variants (it does not account for all the QTL signal)**

| Position<br>(Bos Tau6) | Reference<br>allele | Alternative<br>allele | Imputation<br>Accuracy | Frequency | Effect | P-value    | Annotation with snpEFF                                                                                                                       |
|------------------------|---------------------|-----------------------|------------------------|-----------|--------|------------|----------------------------------------------------------------------------------------------------------------------------------------------|
| 69267975               | C                   | T                     | 0,65                   | 0,23      | -0,37  | 1,8438E-06 | EFF=NON_SYNONYMOUS_CODING(MODERATE MISSENSE tGc/tAc C342Y MSH4 protein_coding CODING ENSBTAT00000024552 8 WARNING_TRANSCRIPT_NO_START_CODON) |



**Credible set of variants ( $r^2 > 0.90$  with the focal variant) associated with secondary BTA6 signal in males from New-Zeland population**

| Position<br>(Bos Tau7) | Reference<br>allele | Alternative<br>allele | Imputation<br>Accuracy | Frequency | Effect   | P-value  | Annotation with snpEFF                                                        | Position<br>(UMD3.1) | Manual annotation UMD3.1            |
|------------------------|---------------------|-----------------------|------------------------|-----------|----------|----------|-------------------------------------------------------------------------------|----------------------|-------------------------------------|
| 119117260              | C                   | A                     | 0,69                   | 0,04      | -1,96    | 3,80E-16 | EFF=INTRON(MODIFIER    POLN protein_coding CODING ENSBTAT00000023023 17)      | 108653486            | intronic POLN                       |
| 118987973              | C                   | A                     | 0,76                   | 0,04      | -1,90    | 4,94E-16 | EFF=INTERGENIC(MODIFIER     )                                                 | 109854107            | intergenic                          |
| 118988834              | C                   | T                     | 0,76                   | 0,04      | -1,90    | 4,99E-16 | EFF=INTERGENIC(MODIFIER     )                                                 | 109854968            | intergenic                          |
| 118987643              | T                   | A                     | 0,76                   | 0,04      | -1,90    | 5,26E-16 | EFF=INTERGENIC(MODIFIER     )                                                 | 109853777            | intergenic                          |
| 118987651              | A                   | AC                    | 0,76                   | 0,04      | -1,90    | 5,32E-16 | EFF=INTERGENIC(MODIFIER     )                                                 | 109853785            | intergenic                          |
| 118987780              | G                   | T                     | 0,77                   | 0,04      | -1,90    | 5,35E-16 | EFF=INTERGENIC(MODIFIER     )                                                 | 109853914            | intergenic                          |
| 118987645              | C                   | A                     | 0,76                   | 0,04      | -1,90    | 5,36E-16 | EFF=INTERGENIC(MODIFIER     )                                                 | 109853779            | intergenic                          |
| 118993083              | G                   | A                     | 0,76                   | 0,04      | -1,89    | 5,58E-16 | EFF=INTERGENIC(MODIFIER     )                                                 | 109859218            | intergenic                          |
| 118984693              | G                   | A                     | 0,75                   | 0,04      | -1,91    | 6,03E-16 | EFF=INTERGENIC(MODIFIER     )                                                 | 109850828            | intergenic                          |
| 118989475              | A                   | G                     | 0,76                   | 0,04      | -1,89    | 6,91E-16 | EFF=INTERGENIC(MODIFIER     )                                                 | 109855609            | intergenic                          |
| 118989180              | T                   | C                     | 0,76                   | 0,04      | -1,89    | 6,94E-16 | EFF=INTERGENIC(MODIFIER     )                                                 | 109855314            | intergenic                          |
| 118989186              | G                   | A                     | 0,76                   | 0,04      | -1,89    | 6,98E-16 | EFF=INTERGENIC(MODIFIER     )                                                 | 109855320            | intergenic                          |
| 118989185              | T                   | C                     | 0,76                   | 0,04      | -1,89    | 7,01E-16 | EFF=INTERGENIC(MODIFIER     )                                                 | 109855319            | intergenic                          |
| 118989123              | A                   | G                     | 0,76                   | 0,04      | -1,89    | 7,01E-16 | EFF=INTERGENIC(MODIFIER     )                                                 | 109855257            | intergenic                          |
| 118983781              | G                   | A                     | 0,76                   | 0,04      | -1,91    | 7,06E-16 | EFF=UPSTREAM(MODIFIER  3575 WHS2 protein_coding CODING ENSBTAT00000023023 17) | 109849112            | intergenic + NELFA (less than 5 kb) |
| 118989315              | C                   | T                     | 0,76                   | 0,04      | -1,89    | 7,07E-16 | EFF=INTERGENIC(MODIFIER     )                                                 | 109855449            | intergenic                          |
| 118990969              | C                   | G                     | 0,76                   | 0,04      | -1,89    | 7,17E-16 | EFF=INTERGENIC(MODIFIER     )                                                 | 109857103            | intergenic                          |
| 119149263              | A                   | G                     | 0,59                   | 0,05      | -1,73    | 6,21E-15 | EFF=INTRON(MODIFIER    POLN protein_coding CODING ENSBTAT00000023023 11)      | 108623237            | intronic POLN                       |
| 119095352              | T                   | G                     | 0,79                   | 0,04      | -1,59    | 2,38E-14 | EFF=INTRON(MODIFIER    POLN protein_coding CODING ENSBTAT00000023023 17)      | 108676667            | intronic POLN                       |
| 119099134              | G                   | T                     | 0,79                   | 0,04      | -1,59    | 2,42E-14 | EFF=INTRON(MODIFIER    POLN protein_coding CODING ENSBTAT00000023023 17)      | 108672891            | intronic POLN                       |
| 118193274              | C                   | T                     | 0,603                  | 0,0649482 | -1,43506 | 5,26E-17 | EFF=INTERGENIC(MODIFIER     )                                                 | 109176513            | NS A77T RNF212 5JZ078754            |

\*The mapping of the last variant is described in supplementary materials

**Credible set of variants ( $r^2 > 0.90$  with the lead variant) associated with BTA10 QTL in males**

| Position<br>(Bos Tau6) | Reference<br>allele | Alternative<br>allele | Imputation<br>Accuracy | Frequency | Effect | P-value  | Annotation with snpEFF                                                                                        |
|------------------------|---------------------|-----------------------|------------------------|-----------|--------|----------|---------------------------------------------------------------------------------------------------------------|
| 21434967               | C                   | A                     | 0,97                   | 0,14      | 1,26   | 4,21E-35 | EFF=UPSTREAM(MODIFIER  951  PABPN1 protein_coding CODING ENSBTAT00000021887 )                                 |
| 21447979               | T                   | T                     | 0,90                   | 0,14      | 1,31   | 6,67E-35 | EFF=NON_SYNONYMOUS_CODING(MODERATE MISSENSE Cgc/Tgc R142C PPP1R3E protein_coding CODING ENSBTAT00000052538 2) |
| 21437447               | T                   | C                     | 1,00                   | 0,15      | 1,22   | 1,16E-34 | EFF=UPSTREAM(MODIFIER  3431  PABPN1 protein_coding CODING ENSBTAT00000021887 )                                |
| 21435508               | C                   | A                     | 0,97                   | 0,15      | 1,25   | 1,49E-34 | EFF=UPSTREAM(MODIFIER  1492  PABPN1 protein_coding CODING ENSBTAT00000021887 )                                |
| 21433130               | C                   | CT                    | 0,94                   | 0,15      | 1,25   | 1,94E-34 | EFF=UTR_5_PRIME(MODIFIER  1210  PABPN1 protein_coding CODING ENSBTAT00000021887 1)                            |
| 21433368               | T                   | C                     | 0,94                   | 0,15      | 1,25   | 1,95E-34 | EFF=UTR_5_PRIME(MODIFIER  1447  PABPN1 protein_coding CODING ENSBTAT00000021887 1)                            |
| 21432767               | GTTC                | G                     | 0,94                   | 0,15      | 1,25   | 2,19E-34 | EFF=UTR_5_PRIME(MODIFIER  847  PABPN1 protein_coding CODING ENSBTAT00000021887 1)                             |
| 21433509               | A                   | G                     | 0,94                   | 0,14      | 1,26   | 2,41E-34 | EFF=UTR_5_PRIME(MODIFIER  1588  PABPN1 protein_coding CODING ENSBTAT00000021887 1)                            |
| 21439886               | T                   | C                     | 0,96                   | 0,15      | 1,23   | 3,11E-34 | EFF=UTR_3_PRIME(MODIFIER  1595  BCL2L2 protein_coding CODING ENSBTAT00000026248 4)                            |
| 21469710               | G                   | A                     | 0,90                   | 0,14      | 1,30   | 5,55E-34 | EFF=INTRON(MODIFIER    RNF212B protein_coding CODING ENSBTAT00000036401 10)                                   |
| 21461898               | C                   | CA                    | 0,91                   | 0,14      | 1,28   | 5,66E-34 | EFF=DOWNSTREAM(MODIFIER  4438  RNF212B protein_coding CODING ENSBTAT00000036401 )                             |
| 21470293               | C                   | T                     | 0,90                   | 0,14      | 1,30   | 7,52E-34 | EFF=INTRON(MODIFIER    RNF212B protein_coding CODING ENSBTAT00000036401 10)                                   |
| 21464136               | A                   | AGAGGAG               | 0,91                   | 0,14      | 1,31   | 7,61E-34 | EFF=DOWNSTREAM(MODIFIER  2200  RNF212B protein_coding CODING ENSBTAT00000036401 )                             |
| 21470834               | A                   | G                     | 0,90                   | 0,14      | 1,29   | 8,18E-34 | EFF=INTRON(MODIFIER    RNF212B protein_coding CODING ENSBTAT00000036401 10)                                   |
| 21469776               | C                   | T                     | 0,90                   | 0,14      | 1,30   | 8,40E-34 | EFF=INTRON(MODIFIER    RNF212B protein_coding CODING ENSBTAT00000036401 10)                                   |
| 21471661               | C                   | T                     | 0,90                   | 0,14      | 1,30   | 1,04E-33 | EFF=INTRON(MODIFIER    RNF212B protein_coding CODING ENSBTAT00000036401 10)                                   |
| 21456962               | C                   | A                     | 0,91                   | 0,14      | 1,30   | 1,07E-33 | EFF=INTERGENIC(MODIFIER     )                                                                                 |
| 21433559               | CAA                 | C                     | 0,94                   | 0,14      | 1,25   | 2,53E-33 | EFF=UTR_5_PRIME(MODIFIER  1639  PABPN1 protein_coding CODING ENSBTAT00000021887 1)                            |
| 21472225               | C                   | CA,CAAA,CA            | 0,79                   | 0,13      | 1,38   | 5,50E-33 | EFF=INTRON(MODIFIER    RNF212B protein_coding CODING ENSBTAT00000036401 10)                                   |
| 21446789               | C                   | G                     | 0,99                   | 0,15      | 1,09   | 1,01E-28 | EFF=UPSTREAM(MODIFIER  3215  BCL2L2 protein_coding CODING ENSBTAT00000026248 )                                |
| 21446724               | T                   | G                     | 1,00                   | 0,15      | 1,08   | 2,15E-28 | EFF=UPSTREAM(MODIFIER  3150  BCL2L2 protein_coding CODING ENSBTAT00000026248 )                                |

**Credible set of variants ( $r^2 > 0.90$  with the lead variant) associated with BTA10 QTL in females**

| Position<br>(Bos Tau6) | Reference<br>allele | Alternative<br>allele | Imputation<br>Accuracy | Frequency | Effect | P-value  | Annotation with snpEFF                                                                                        |
|------------------------|---------------------|-----------------------|------------------------|-----------|--------|----------|---------------------------------------------------------------------------------------------------------------|
| 21461898               | C                   | CA                    | 0,91                   | 0,12      | 0,94   | 9,47E-25 | EFF=DOWNSTREAM(MODIFIER  4438  RNF212B protein_coding CODING ENSBTAT00000036401 )                             |
| 21471661               | C                   | T                     | 0,90                   | 0,12      | 0,96   | 9,84E-25 | EFF=INTRON(MODIFIER    RNF212B protein_coding CODING ENSBTAT00000036401 10)                                   |
| 21470834               | A                   | G                     | 0,90                   | 0,12      | 0,95   | 1,09E-24 | EFF=INTRON(MODIFIER    RNF212B protein_coding CODING ENSBTAT00000036401 10)                                   |
| 21469776               | C                   | T                     | 0,90                   | 0,12      | 0,95   | 1,12E-24 | EFF=INTRON(MODIFIER    RNF212B protein_coding CODING ENSBTAT00000036401 10)                                   |
| 21469710               | G                   | A                     | 0,90                   | 0,12      | 0,95   | 1,17E-24 | EFF=INTRON(MODIFIER    RNF212B protein_coding CODING ENSBTAT00000036401 10)                                   |
| 21470293               | C                   | T                     | 0,90                   | 0,12      | 0,95   | 1,20E-24 | EFF=INTRON(MODIFIER    RNF212B protein_coding CODING ENSBTAT00000036401 10)                                   |
| 21456962               | C                   | A                     | 0,91                   | 0,11      | 0,96   | 1,91E-24 | EFF=INTERGENIC(MODIFIER     )                                                                                 |
| 21478929               | T                   | A                     | 0,90                   | 0,11      | 0,97   | 2,18E-24 | EFF=INTRON(MODIFIER    RNF212B protein_coding CODING ENSBTAT00000036401 6)                                    |
| 21472613               | G                   | A                     | 0,90                   | 0,11      | 0,96   | 2,93E-24 | EFF=INTRON(MODIFIER    RNF212B protein_coding CODING ENSBTAT00000036401 10)                                   |
| 21464136               | A                   | AGAGGAG               | 0,91                   | 0,11      | 0,97   | 3,95E-24 | EFF=DOWNSTREAM(MODIFIER  2200  RNF212B protein_coding CODING ENSBTAT00000036401 )                             |
| 21447979               | C                   | T                     | 0,90                   | 0,12      | 0,93   | 1,11E-23 | EFF=NON_SYNONYMOUS_CODING(MODERATE MISSENSE Cgc/Tgc R142C PPP1R3E protein_coding CODING ENSBTAT00000052538 2) |
| 21434967               | C                   | A                     | 0,97                   | 0,12      | 0,90   | 2,96E-23 | EFF=UPSTREAM(MODIFIER  951  PABPN1 protein_coding CODING ENSBTAT00000021887 )                                 |
| 21439886               | T                   | C                     | 0,96                   | 0,12      | 0,87   | 1,02E-22 | EFF=UTR_3_PRIME(MODIFIER  1595  BCL2L2 protein_coding CODING ENSBTAT00000026248 4)                            |
| 21472225               | C                   | CA,CAAA,CA            | 0,79                   | 0,10      | 1,02   | 1,02E-22 | EFF=INTRON(MODIFIER    RNF212B protein_coding CODING ENSBTAT00000036401 10)                                   |
| 21476907               | C                   | G,A                   | 0,91                   | 0,12      | 0,91   | 1,38E-22 | EFF=INTRON(MODIFIER    RNF212B protein_coding CODING ENSBTAT00000036401 10)                                   |
| 21435508               | C                   | A                     | 0,97                   | 0,12      | 0,88   | 1,48E-22 | EFF=UPSTREAM(MODIFIER  1492  PABPN1 protein_coding CODING ENSBTAT00000021887 )                                |
| 21478867               | A                   | G                     | 0,90                   | 0,12      | 0,91   | 1,55E-22 | EFF=INTRON(MODIFIER    RNF212B protein_coding CODING ENSBTAT00000036401 6)                                    |
| 21478701               | GA                  | G                     | 0,90                   | 0,12      | 0,91   | 1,64E-22 | EFF=INTRON(MODIFIER    RNF212B protein_coding CODING ENSBTAT00000036401 6)                                    |
| 21437447               | T                   | C                     | 1,00                   | 0,12      | 0,86   | 1,87E-22 | EFF=UPSTREAM(MODIFIER  3431  PABPN1 protein_coding CODING ENSBTAT00000021887 )                                |
| 21433509               | A                   | G                     | 0,94                   | 0,12      | 0,88   | 1,93E-22 | EFF=UTR_5_PRIME(MODIFIER  1588  PABPN1 protein_coding CODING ENSBTAT00000021887 1)                            |
| 21433130               | C                   | CT                    | 0,94                   | 0,12      | 0,87   | 2,34E-22 | EFF=UTR_5_PRIME(MODIFIER  1210  PABPN1 protein_coding CODING ENSBTAT00000021887 1)                            |
| 21433368               | T                   | C                     | 0,94                   | 0,12      | 0,87   | 2,35E-22 | EFF=UTR_5_PRIME(MODIFIER  1447  PABPN1 protein_coding CODING ENSBTAT00000021887 1)                            |
| 21432767               | GTTC                | G                     | 0,94                   | 0,12      | 0,87   | 2,50E-22 | EFF=UTR_5_PRIME(MODIFIER  847  PABPN1 protein_coding CODING ENSBTAT00000021887 1)                             |
| 21433559               | CAA                 | C                     | 0,94                   | 0,12      | 0,89   | 4,15E-22 | EFF=UTR_5_PRIME(MODIFIER  1639  PABPN1 protein_coding CODING ENSBTAT00000021887 1)                            |

**Credible set of variants ( $r^2 > 0.90$  with the lead variant) associated with BTA10 QTL in males**

| Position<br>(Bos Tau6) | Reference<br>allele | Alternative<br>allele | Imputation<br>Accuracy | Frequency | Effect     | P-value    | Annotation with snpEFF                                                        |
|------------------------|---------------------|-----------------------|------------------------|-----------|------------|------------|-------------------------------------------------------------------------------|
| 21493479               | A                   | T                     | 0,931                  | 0,533018  | -0,6475834 | 4,6558E-24 | EFF=INTRON(MODIFIER   RN212B protein_coding CODING ENSBTAT00000036401 1)      |
| 21494816               | T                   | C                     | 0,978                  | 0,499326  | -0,6077077 | 3,5898E-22 | EFF=UPSTREAM(MODIFIER  120  RN212B protein_coding CODING ENSBTAT00000036401 ) |

**Credible set of variants ( $r^2 > 0.90$  with the lead variant) associated with BTA10 QTL in females from New-Zealand population**

| Position<br>(Bos Tau6) | Reference<br>allele | Alternative<br>allele | Imputation<br>Accuracy | Frequency | Effect     | P-value    | Annotation with snpEFF                                                                          |
|------------------------|---------------------|-----------------------|------------------------|-----------|------------|------------|-------------------------------------------------------------------------------------------------|
| 21494628               | G                   | A                     | 0,867                  | 0,123488  | -1,1601585 | 9,2748E-14 | EFF=SYNONYMOUS_CODING(LOW SILENT ggC/ggT G23 RN212B protein_coding CODING ENSBTAT00000036401 1) |

Note: these two signals are independent (low LD)

**Credible set of variants ( $r^2 > 0.90$  with the lead variant) associated with BTA10 QTL in females**

| Position<br>(Bos Tau6) | Reference<br>allele | Alternative<br>allele | Imputation<br>Accuracy | Frequency | Effect | P-value  | Annotation with snpEFF                                                                                     |
|------------------------|---------------------|-----------------------|------------------------|-----------|--------|----------|------------------------------------------------------------------------------------------------------------|
| 86631169               | C                   | T                     | 0,95                   | 0,40      | 0,79   | 1,84E-24 | EFF=INTERGENIC(MODIFIER     )                                                                              |
| 86664489               | CT                  | C,CTT                 | 0,66                   | 0,38      | 0,88   | 1,65E-24 | EFF=DOWNSTREAM(MODIFIER   3148  EIF2B2 protein_coding CODING ENSBTAT00000011424 )                          |
| 86673101               | A                   | G                     | 0,93                   | 0,37      | 0,73   | 3,88E-19 | EFF=INTRON(MODIFIER    MLH3 protein_coding CODING ENSBTAT00000061421 10)                                   |
| 86680485               | T                   | C                     | 0,96                   | 0,39      | 0,79   | 7,47E-25 | EFF=INTRON(MODIFIER    MLH3 protein_coding CODING ENSBTAT00000061421 6)                                    |
| 86693617               | T                   | C                     | 0,97                   | 0,40      | 0,77   | 1,43E-24 | EFF=NON_SYNONYMOUS_CODING(MODERATE MISSENSE aA/aG N408S MLH3 protein_coding CODING ENSBTAT00000061421 1)   |
| 86702295               | G                   | C                     | 0,98                   | 0,40      | 0,77   | 1,49E-24 | EFF=UTR_3_PRIME(MODIFIER  5  ACYP1 protein_coding CODING ENSBTAT00000018595 3)                             |
| 86706386               | C                   | T                     | 0,97                   | 0,40      | 0,77   | 1,52E-24 | EFF=INTRON(MODIFIER    ACYP1 protein_coding CODING ENSBTAT00000018595 2)                                   |
| 86706846               | C                   | T                     | 0,98                   | 0,40      | 0,77   | 1,54E-24 | EFF=INTRON(MODIFIER    ACYP1 protein_coding CODING ENSBTAT00000018595 2)                                   |
| 86709241               | T                   | C,G                   | 0,98                   | 0,59      | -0,73  | 4,78E-22 | EFF=UPSTREAM(MODIFIER  863  ACYP1 protein_coding CODING ENSBTAT00000018595 )                               |
| 86709874               | C                   | A                     | 0,98                   | 0,40      | 0,76   | 3,41E-24 | EFF=UPSTREAM(MODIFIER  1496  ACYP1 protein_coding CODING ENSBTAT00000018595 )                              |
| 86711494               | C                   | T                     | 0,99                   | 0,40      | 0,77   | 1,68E-24 | EFF=UPSTREAM(MODIFIER  3116  ACYP1 protein_coding CODING ENSBTAT00000018595 )                              |
| 86713312               | G                   | A                     | 0,92                   | 0,38      | 0,79   | 1,10E-24 | EFF=UPSTREAM(MODIFIER  4934  ACYP1 protein_coding CODING ENSBTAT00000018595 )                              |
| 86717378               | T                   | C                     | 1,00                   | 0,41      | 0,71   | 1,10E-21 | EFF=INTRON(MODIFIER    ZC2HC1C protein_coding CODING ENSBTAT00000018587 1)                                 |
| 86720487               | C                   | T                     | 0,98                   | 0,41      | 0,72   | 1,03E-21 | EFF=INTRON(MODIFIER    ZC2HC1C protein_coding CODING ENSBTAT00000018587 1)                                 |
| 86720872               | G                   | T                     | 0,99                   | 0,41      | 0,72   | 9,93E-22 | EFF=INTRON(MODIFIER    ZC2HC1C protein_coding CODING ENSBTAT00000018587 1)                                 |
| 86723060               | C                   | T                     | 0,97                   | 0,39      | 0,79   | 8,31E-25 | EFF=DOWNSTREAM(MODIFIER 813  ZC2HC1C protein_coding CODING ENSBTAT00000018587 )                            |
| 86728875               | AT                  | A                     | 0,98                   | 0,41      | 0,72   | 1,07E-21 | EFF=INTRON(MODIFIER    NEK9 protein_coding CODING ENSBTAT00000022098 21 WARNING_TRANSCRIPT_NO_START_CODON) |
| 86729453               | T                   | C                     | 0,98                   | 0,41      | 0,72   | 1,07E-21 | EFF=INTRON(MODIFIER    NEK9 protein_coding CODING ENSBTAT00000022098 21 WARNING_TRANSCRIPT_NO_START_CODON) |
| 86732671               | ATTTTC              | A                     | 0,98                   | 0,40      | 0,77   | 1,74E-24 | EFF=INTRON(MODIFIER    NEK9 protein_coding CODING ENSBTAT00000022098 19 WARNING_TRANSCRIPT_NO_START_CODON) |
| 86732855               | G                   | C                     | 0,97                   | 0,42      | 0,72   | 1,20E-21 | EFF=INTRON(MODIFIER    NEK9 protein_coding CODING ENSBTAT00000022098 19 WARNING_TRANSCRIPT_NO_START_CODON) |
| 86738051               | C                   | T                     | 0,98                   | 0,40      | 0,77   | 1,53E-24 | EFF=INTRON(MODIFIER    NEK9 protein_coding CODING ENSBTAT00000022098 16 WARNING_TRANSCRIPT_NO_START_CODON) |

**Credible set of variants ( $r^2 > 0.90$  with the lead variant) associated with BTA10 QTL in females**

| Position<br>(Bos Tau6) | Reference<br>allele | Alternative<br>allele | Imputation<br>Accuracy | Frequency | Effect | P-value  | Annotation with snpEFF                                                                                    |
|------------------------|---------------------|-----------------------|------------------------|-----------|--------|----------|-----------------------------------------------------------------------------------------------------------|
| 86673101               | A                   | G                     | 0,93                   | 0,41      | 0,52   | 3,56E-15 | EFF=INTRON(MODIFIER    MLH3 protein_coding CODING ENSBTAT00000061421 10)                                  |
| 86751935               | C                   | T                     | 0,91                   | 0,41      | 0,52   | 3,57E-15 | EFF=INTRON(MODIFIER    NEK9 protein_coding CODING ENSBTAT00000022098 7 WARNING_TRANSCRIPT_NO_START_CODON) |
| 86755249               | G                   | T                     | 0,95                   | 0,41      | 0,51   | 3,57E-15 | EFF=INTRON(MODIFIER    NEK9 protein_coding CODING ENSBTAT00000022098 5 WARNING_TRANSCRIPT_NO_START_CODON) |
| 86768372               | T                   | G                     | 0,98                   | 0,42      | 0,48   | 2,46E-14 | EFF=DOWNSTREAM(MODIFIER  1749  TMED10 protein_coding CODING ENSBTAT00000007481 )                          |
| 86766231               | CAT                 | C                     | 0,98                   | 0,41      | 0,49   | 2,49E-14 | EFF=DOWNSTREAM(MODIFIER  3889  TMED10 protein_coding CODING ENSBTAT00000007481 )                          |
| 86766800               | G                   | A                     | 0,98                   | 0,42      | 0,48   | 2,60E-14 | EFF=DOWNSTREAM(MODIFIER  3321  TMED10 protein_coding CODING ENSBTAT00000007481 )                          |
| 86763787               | ATATT               | A                     | 0,97                   | 0,41      | 0,49   | 2,85E-14 | EFF=INTERGENIC(MODIFIER     )                                                                             |
| 86772070               | A                   | G                     | 1,00                   | 0,41      | 0,48   | 3,20E-14 | EFF=INTRON(MODIFIER    TMED10 protein_coding CODING ENSBTAT00000007481 5)                                 |
| 86764892               | AGG                 | A                     | 0,98                   | 0,42      | 0,49   | 3,29E-14 | EFF=INTERGENIC(MODIFIER     )                                                                             |
| 86764891               | G                   | T                     | 0,98                   | 0,42      | 0,49   | 3,30E-14 | EFF=INTERGENIC(MODIFIER     )                                                                             |
| 86768306               | G                   | A                     | 0,98                   | 0,42      | 0,48   | 3,98E-14 | EFF=DOWNSTREAM(MODIFIER  1815  TMED10 protein_coding CODING ENSBTAT00000007481 )                          |
| 86680485               | T                   | C                     | 0,96                   | 0,43      | 0,49   | 5,34E-14 | EFF=INTRON(MODIFIER    MLH3 protein_coding CODING ENSBTAT00000061421 6)                                   |
| 86693617               | T                   | C                     | 0,97                   | 0,43      | 0,48   | 6,72E-14 | EFF=NON_SYNONYMOUS_CODING(MODERATE MISSENSE aA/aG N408S MLH3 protein_coding CODING ENSBTAT00000061421 1)  |

**Credible set of variants ( $r^2 > 0.90$  with the lead variant) associated with BTA18 QTL in males from New-Zealand population**

| Position<br>(Bos Tau6) | Reference<br>allele | Alternative<br>allele | Imputation<br>Accuracy | Frequency | Effect | P-value  | Annotation with snpEFF                                                                                       |
|------------------------|---------------------|-----------------------|------------------------|-----------|--------|----------|--------------------------------------------------------------------------------------------------------------|
| 54529525               | A                   | G                     | 0,65                   | 0,62      | -0,54  | 8,98E-09 | EFF=DOWNSTREAM(MODIFIER  3426  TMEM160 protein_coding CODING ENSBTAT00000020695)                             |
| 54531020               | T                   | A                     | 0,95                   | 0,74      | -0,42  | 2,36E-06 | EFF=DOWNSTREAM(MODIFIER  1931  TMEM160 protein_coding CODING ENSBTAT00000020695)                             |
| 54531573               | T                   | C                     | 0,95                   | 0,74      | -0,42  | 2,39E-06 | EFF=NON_SYNONYMOUS_CODING(MODERATE MISSENSE gTg/gCg V420A NPAS1 protein_coding CODING ENSBTAT00000020691 10) |



**Credible set of variants ( $r^2 > 0.90$  with the lead variant) associated with BTA23 QTL in males**

| (Bos Tau6) | Position | Reference allele | Alternative allele | Imputation Accuracy | Frequency | Effect | P-value  | Annotation with snpEFF                                                                                       |
|------------|----------|------------------|--------------------|---------------------|-----------|--------|----------|--------------------------------------------------------------------------------------------------------------|
| 27552408   | T        | C                | C                  | 0,94                | 0,05      | -1,18  | 1,90E-13 | EFF=INTRON(MODIFIER    NFKBIL1 protein_coding CODING ENSBTAT00000019268 2)                                   |
| 27556583   | T        | C                | C                  | 0,97                | 0,05      | -1,17  | 1,99E-13 | EFF=UPSTREAM(MODIFIER  4997 ATP6V1G2 protein_coding CODING ENSBTAT00000019267 )                              |
| 27555428   | G        | A                | A                  | 0,97                | 0,05      | -1,17  | 2,01E-13 | EFF=INTRON(MODIFIER    NFKBIL1 protein_coding CODING ENSBTAT00000019268 2)                                   |
| 27555785   | A        | G                | G                  | 0,97                | 0,05      | -1,17  | 2,01E-13 | EFF=INTRON(MODIFIER    NFKBIL1 protein_coding CODING ENSBTAT00000019268 2)                                   |
| 27377717   | C        | T                | T                  | 0,70                | 0,05      | -1,23  | 2,67E-13 | EFF=NON_SYNONYMOUS_CODING(MODERATE MISSENSE cGa/cAa R631Q MSH5 protein_coding CODING ENSBTAT00000026367 20)  |
| 27561840   | G        | C                | C                  | 0,92                | 0,05      | -1,17  | 2,75E-13 | EFF=UPSTREAM(MODIFIER  1212 NFKBIL1 protein_coding CODING ENSBTAT00000035817 )                               |
| 27551876   | T        | C                | C                  | 0,96                | 0,05      | -1,16  | 2,77E-13 | EFF=INTRON(MODIFIER    NFKBIL1 protein_coding CODING ENSBTAT00000019268 2)                                   |
| 27551895   | A        | G                | G                  | 0,96                | 0,05      | -1,16  | 2,77E-13 | EFF=INTRON(MODIFIER    NFKBIL1 protein_coding CODING ENSBTAT00000019268 2)                                   |
| 27435921   | T        | A                | A                  | 0,99                | 0,05      | -1,15  | 3,44E-13 | EFF=DOWNSTREAM(MODIFIER  203 ABHD16A protein_coding CODING ENSBTAT0000000755 )                               |
| 27431131   | C        | G                | G                  | 0,99                | 0,05      | -1,14  | 4,49E-13 | EFF=INTRON(MODIFIER    ABHD16A protein_coding CODING ENSBTAT0000000755 7)                                    |
| 27573659   | C        | T                | T                  | 0,88                | 0,05      | -1,21  | 4,69E-13 | EFF=DOWNSTREAM(MODIFIER  2271 SNORD83 snoRNA NON_CODING ENSBTAT00000060475 )                                 |
| 27529226   | G        | A                | A                  | 0,69                | 0,05      | -1,23  | 9,15E-13 | EFF=UPSTREAM(MODIFIER  630 LTB protein_coding CODING ENSBTAT00000027554 )                                    |
| 27244422   | G        | A                | A                  | 0,79                | 0,05      | -1,20  | 1,20E-12 | EFF=UPSTREAM(MODIFIER  1072 C2 protein_coding CODING ENSBTAT00000045436 )                                    |
| 27243216   | G        | T,A              | T                  | 0,92                | 0,05      | -1,11  | 1,30E-12 | EFF=INTRON(MODIFIER    C2 protein_coding CODING ENSBTAT00000009798 1)                                        |
| 27252191   | G        | A                | A                  | 0,94                | 0,05      | -1,14  | 1,44E-12 | EFF=INTERGENIC(MODIFIER     )                                                                                |
| 27241591   | A        | G                | G                  | 0,93                | 0,05      | -1,14  | 1,45E-12 | EFF=INTRON(MODIFIER    C2 protein_coding CODING ENSBTAT00000009798 3)                                        |
| 27298179   | CCTT     | C                | C                  | 0,95                | 0,05      | -1,12  | 1,48E-12 | EFF=INTRON(MODIFIER    SLC44A4 protein_coding CODING ENSBTAT00000045367 9)                                   |
| 27256840   | A        | T                | T                  | 0,95                | 0,05      | -1,13  | 1,53E-12 | EFF=INTERGENIC(MODIFIER     )                                                                                |
| 27240172   | T        | A                | A                  | 0,79                | 0,05      | -1,18  | 1,55E-12 | EFF=NON_SYNONYMOUS_CODING(MODERATE MISSENSE tAc/tTc Y210F C2 protein_coding CODING ENSBTAT00000009798 5)     |
| 27242073   | A        | G                | G                  | 0,93                | 0,05      | -1,14  | 1,56E-12 | EFF=INTRON(MODIFIER    C2 protein_coding CODING ENSBTAT00000009798 3)                                        |
| 27262046   | G        | A                | A                  | 0,96                | 0,05      | -1,13  | 1,57E-12 | EFF=INTERGENIC(MODIFIER     )                                                                                |
| 27268266   | C        | T                | T                  | 0,96                | 0,05      | -1,13  | 1,60E-12 | EFF=INTERGENIC(MODIFIER     )                                                                                |
| 27293140   | C        | T                | T                  | 0,94                | 0,05      | -1,12  | 1,60E-12 | EFF=INTRON(MODIFIER    SLC44A4 protein_coding CODING ENSBTAT00000045367 1)                                   |
| 27293082   | A        | C                | C                  | 0,91                | 0,05      | -1,13  | 1,61E-12 | EFF=INTRON(MODIFIER    SLC44A4 protein_coding CODING ENSBTAT00000045367 1)                                   |
| 27242318   | A        | G                | G                  | 0,93                | 0,05      | -1,14  | 1,63E-12 | EFF=SYNONYMOUS_CODING(LOW SILENT ccT/ccC P92 C2 protein_coding CODING ENSBTAT00000009798 3)                  |
| 27244332   | C        | T                | T                  | 0,95                | 0,05      | -1,13  | 1,63E-12 | EFF=UPSTREAM(MODIFIER  982 C2 protein_coding CODING ENSBTAT00000045436 )                                     |
| 27270434   | A        | G                | G                  | 0,97                | 0,05      | -1,13  | 1,69E-12 | EFF=UPSTREAM(MODIFIER  3600 ZBTB12 protein_coding CODING ENSBTAT00000045434 )                                |
| 27510065   | C        | T                | T                  | 0,67                | 0,05      | -1,20  | 1,71E-12 | EFF=UPSTREAM(MODIFIER  4608 AIF1 protein_coding CODING ENSBTAT00000027388 )                                  |
| 27292772   | C        | T                | T                  | 0,89                | 0,05      | -1,14  | 1,71E-12 | EFF=INTRON(MODIFIER    SLC44A4 protein_coding CODING ENSBTAT00000045367 1)                                   |
| 27508554   | Q        | G                | G                  | 0,66                | 0,05      | -1,20  | 1,76E-12 | EFF=UPSTREAM(MODIFIER  3098 AIF1 protein_coding CODING ENSBTAT00000027388 )                                  |
| 27264559   | C        | T                | T                  | 0,98                | 0,05      | -1,13  | 1,90E-12 | EFF=INTERGENIC(MODIFIER     )                                                                                |
| 27315855   | T        | C                | C                  | 0,95                | 0,05      | -1,10  | 2,14E-12 | EFF=INTERGENIC(MODIFIER     )                                                                                |
| 27243583   | C        | T                | T                  | 0,93                | 0,05      | -1,12  | 2,15E-12 | EFF=UPSTREAM(MODIFIER  233 C2 protein_coding CODING ENSBTAT00000045436 )                                     |
| 27500660   | A        | G                | G                  | 0,58                | 0,05      | -1,23  | 2,20E-12 | EFF=UPSTREAM(MODIFIER  891 ENSBTAG00000037350 miRNA NON_CODING ENSBTAT00000051850 )                          |
| 27306012   | C        | T                | T                  | 0,97                | 0,05      | -1,09  | 2,39E-12 | EFF=DOWNSTREAM(MODIFIER  675 SLC44A4 protein_coding CODING ENSBTAT00000045367 )                              |
| 27323325   | C        | T                | T                  | 0,95                | 0,05      | -1,10  | 2,86E-12 | EFF=DOWNSTREAM(MODIFIER  1911 SNORD52 snoRNA NON_CODING ENSBTAT00000059981 )                                 |
| 27327955   | A        | G                | G                  | 0,88                | 0,05      | -1,10  | 6,65E-12 | EFF=UPSTREAM(MODIFIER  2653 SNORD52 snoRNA NON_CODING ENSBTAT00000059981 )                                   |
| 27212490   | G        | A                | A                  | 0,66                | 0,06      | -1,13  | 1,53E-11 | EFF=NON_SYNONYMOUS_CODING(MODERATE MISSENSE aCg/aTg T714M SKIV2L protein_coding CODING ENSBTAT0000007339 18) |
| 27234192   | C        | G                | G                  | 0,82                | 0,06      | -1,08  | 2,18E-11 | EFF=UPSTREAM(MODIFIER  2900 CFB protein_coding CODING ENSBTAT00000009800 )                                   |
